# Supplementary material for: Zn2+ -mediated siRNA-doxorubicin Self-Assembled Nanoparticles amplify immunogenic cell death via aggravating redox dyshomeostasis for cancer therapy
Source: Research Square preprint supplement (doi:10.21203/rs.3.rs-7778310/v1), 2025-10-20
Supplement: Supplementary file 1 [file 5d38559ea012ab64f584e73b.docx]

**Zn2+-mediated siRNA-doxorubicin Self-Assembled Nanoparticles amplify immunogenic cell death via aggravating** **redox dyshomeostasis for cancer therapy**

Tab.S1 The results of entrapment efficiency (EE%) (n = 3)

| Sample | Mass ratio (*m/m*) | *LE*% | *EE*% |
| --- | --- | --- | --- |
| Zn2+/DOX | 1:1 | 40.6 ± 0.71 | 99.44 ± 1.38 |
| 1:2 | 73.08 ± 0.79 | 99.42 ± 0.72 |
| 1:4 | 73.34 ± 0.86 | 76.02 ± 1.53 |


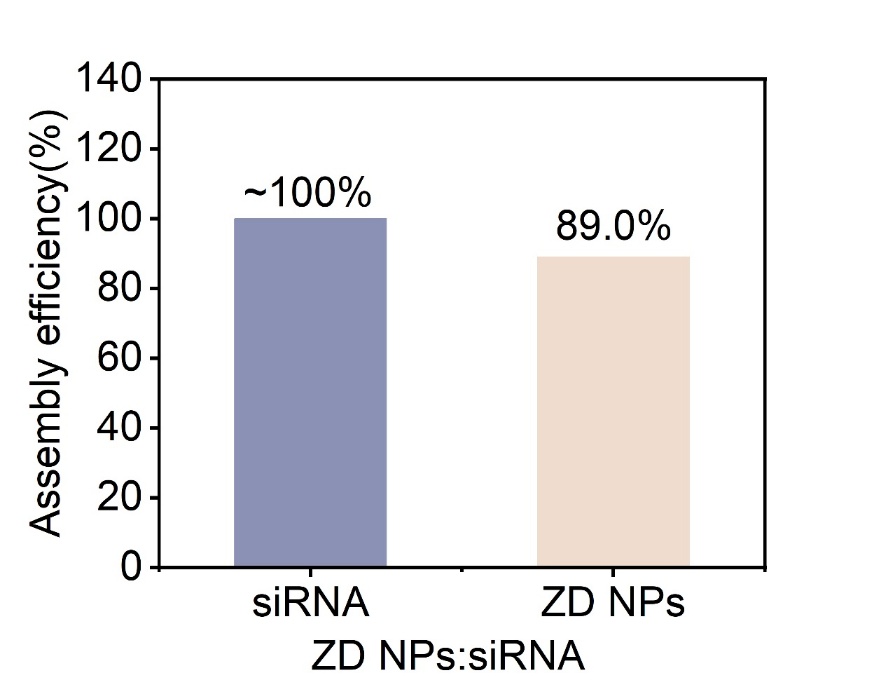


Fig.S1 The assembly efficiencies of ZD NPs and siRNA in the ZD NPs:siRNA.


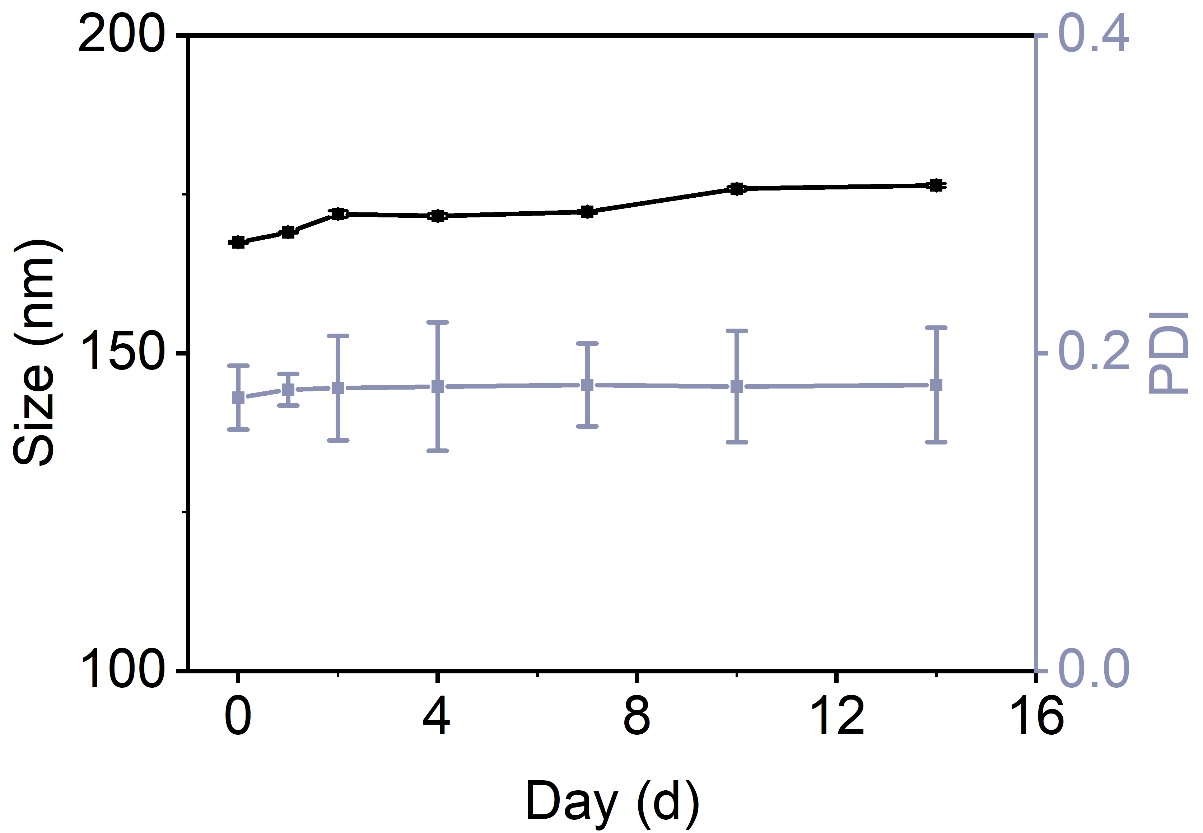


Fig.S2 Serum stability of ZD NPs


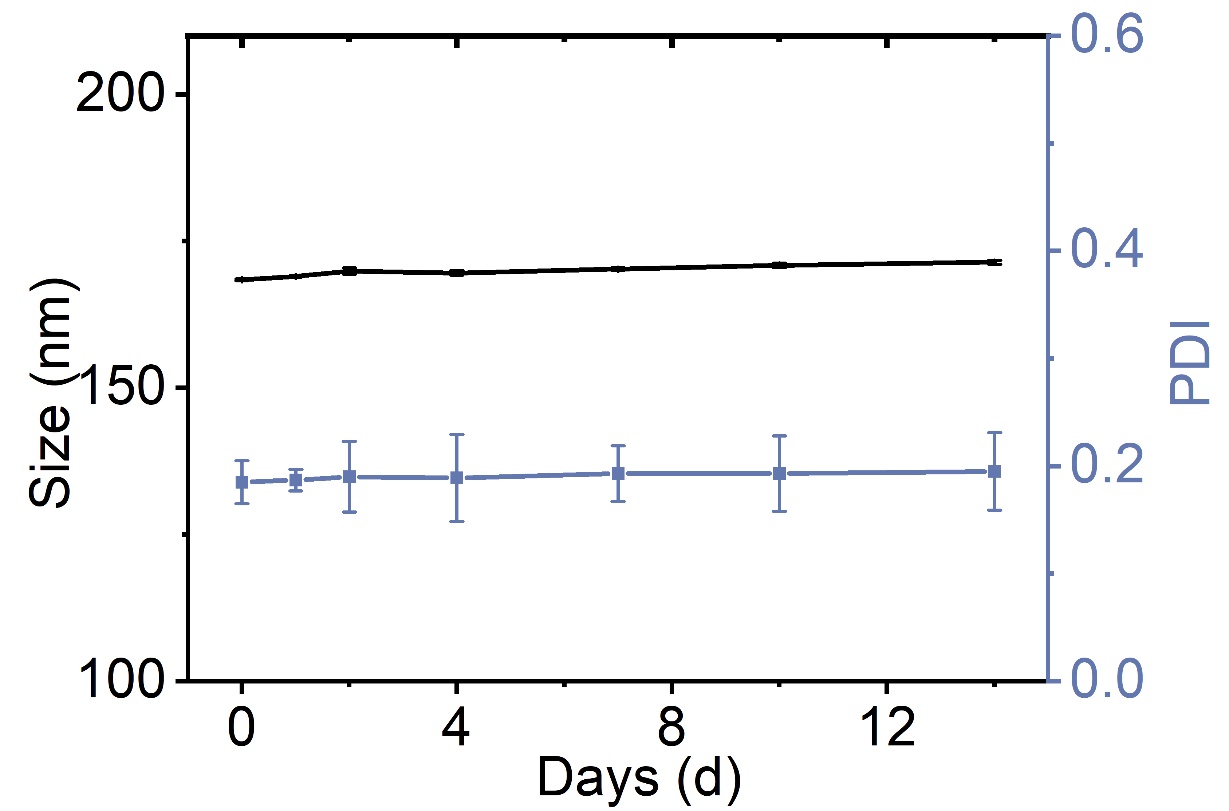


Fig.S3 Serum stability of ZDS NPs


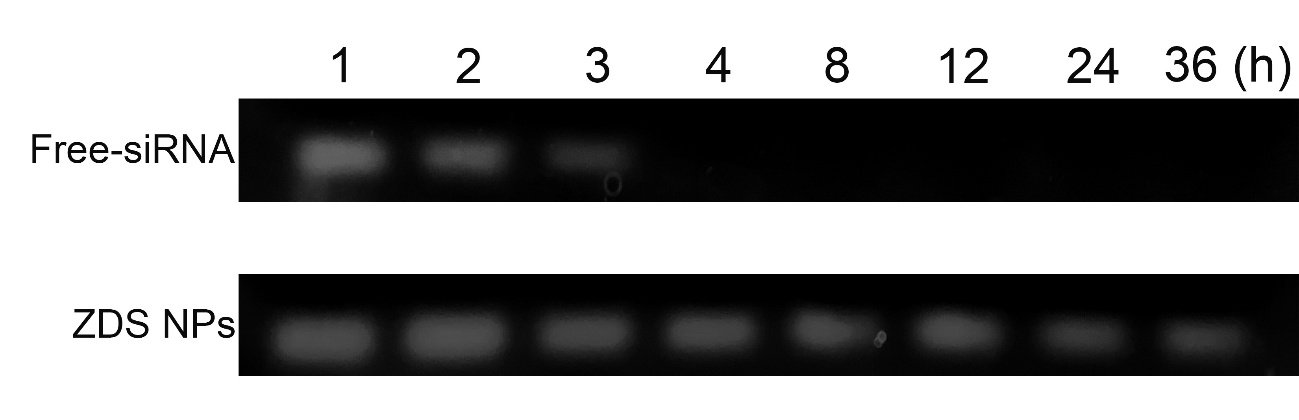


Fig.S4 *In vitro* serum stability of ZDS NPs determined using agarose gel electrophoresis analysis

Tab.S2 Tumor inhibition rate of 4T1-bearing mice treated with different DOX formulations.

(*n* = 6, compared to control, ****P* < 0.001).

| Treatment group | TIRV(%) |
| --- | --- |
| Control | - |
| DOX | 58.7 ± 4.2 |
| Zn2+-DOX NPs | 65.3±5.7 |
| Zn2+-DOX@siRNA | 86.4± 0.72*** |


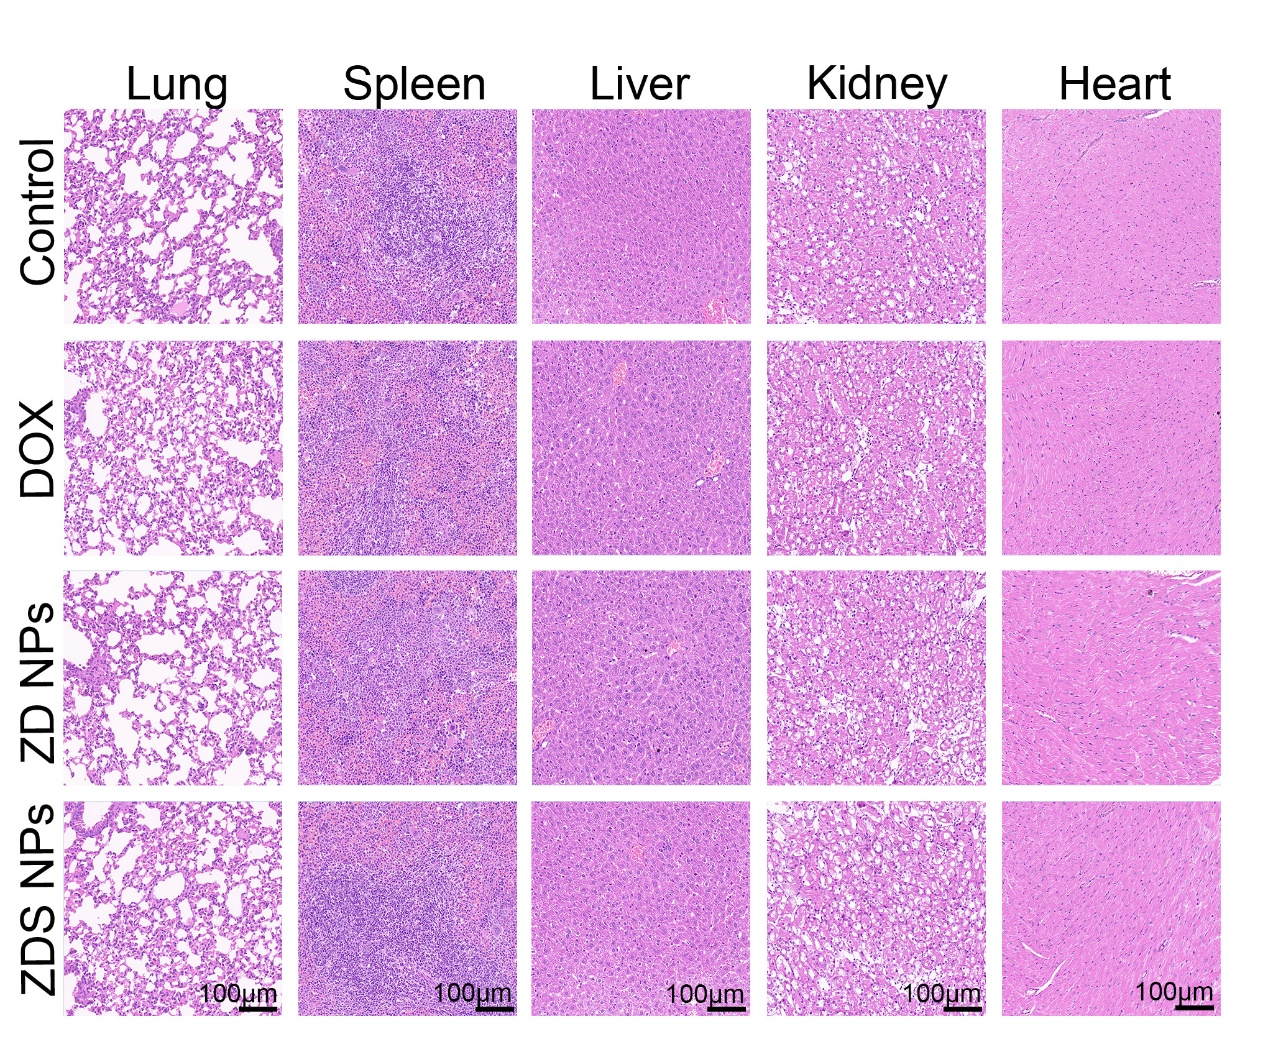


Fig.S5 H&E staining of the heart, liver, spleen, lung, and kidney of major organs scale bars represented 100 μm.
